# Supplementary material for: Regulating the modulus of a chiral liquid crystal polymer network by light
Source: Royal Society of Chemistry journal article supplement (doi:10.1039/c6sm00114a), 2016-01-01
Supplement: c6sm00114a1.pdf [file c6sm00114a1.pdf]

## Supplementary Information: **Regulating the Modulus in Chiral Liquid Crystal Polymer Network by Light**

Kamlesh Kumar,<sup>a</sup> Albertus P. H. J Schenning,<sup>a, b</sup> Dirk J. Broer<sup>a, b</sup> and Danqing Liu<sup>\*a, b</sup>

- <sup>a.</sup> Laboratory of Functional Organic Materials & Devices (SFD), Department of Chemical Engineering & Chemistry, Eindhoven University of Technology, De Rondom 70, 5612 AP, Eindhoven, The Netherlands
- <sup>b.</sup> Institute for Complex Molecular Systems (ICMS), Eindhoven University of Technology, De Rondom 70, 5612 AP, Eindhoven, The Netherlands

(Dated: January 14, 2016)

### Temperature changes under the light illumination

The temperature of the sample is examined by a thermal couple (Fluke, 80PK-1 K-Type Bead Thermocouple) and an infrared camera (Fluke Ti-32). The absorption of azobenzene molecules cause the temperature to rise when exposed to UV light (365 nm). Adding blue light (455 nm) during continuous UV exposure results in a steady temperature increase.

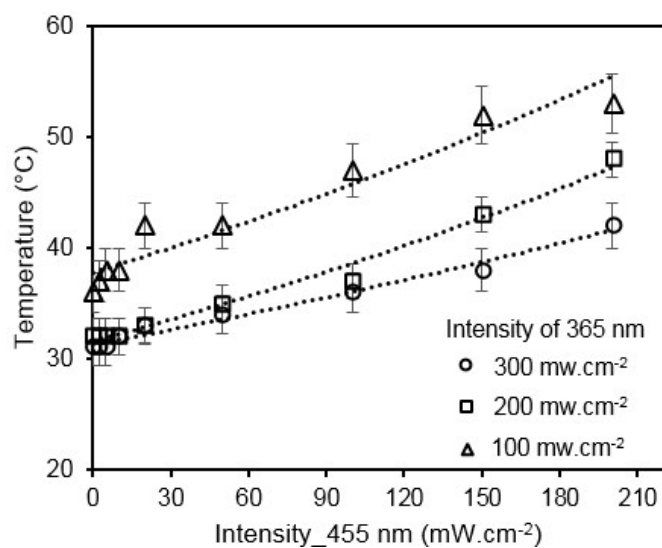

**Fig. S1** Recorded temperature of the low crosslinked film under various illumination conditions. Continuous UV light at 300 mW.cm<sup>-2</sup> (Δ), 200 mW.cm<sup>-2</sup> (□), and 100 mW.cm<sup>-2</sup> (O) are blended with increasing blue light (455 nm) intensities of 0, 2.5, 5, 10, 20, 50, 100, 150, 200 mW.cm<sup>-2</sup>, respectively.

### Modulus changes under different UV light intensities

In Fig. 3 in the main text, we present the modulus change of the low crosslink density sample under a blend of continuous UV (365 nm) light at the intensity of  $300 \text{ mW}\cdot\text{cm}^{-2}$  and varied blue light (455 nm) intensities. Fig. S2 shows the effect of the intensity of 365 nm light by varying it at  $100 \text{ mW}\cdot\text{cm}^{-2}$  and  $200 \text{ mW}\cdot\text{cm}^{-2}$  while additional 455 nm light with different intensities are included.

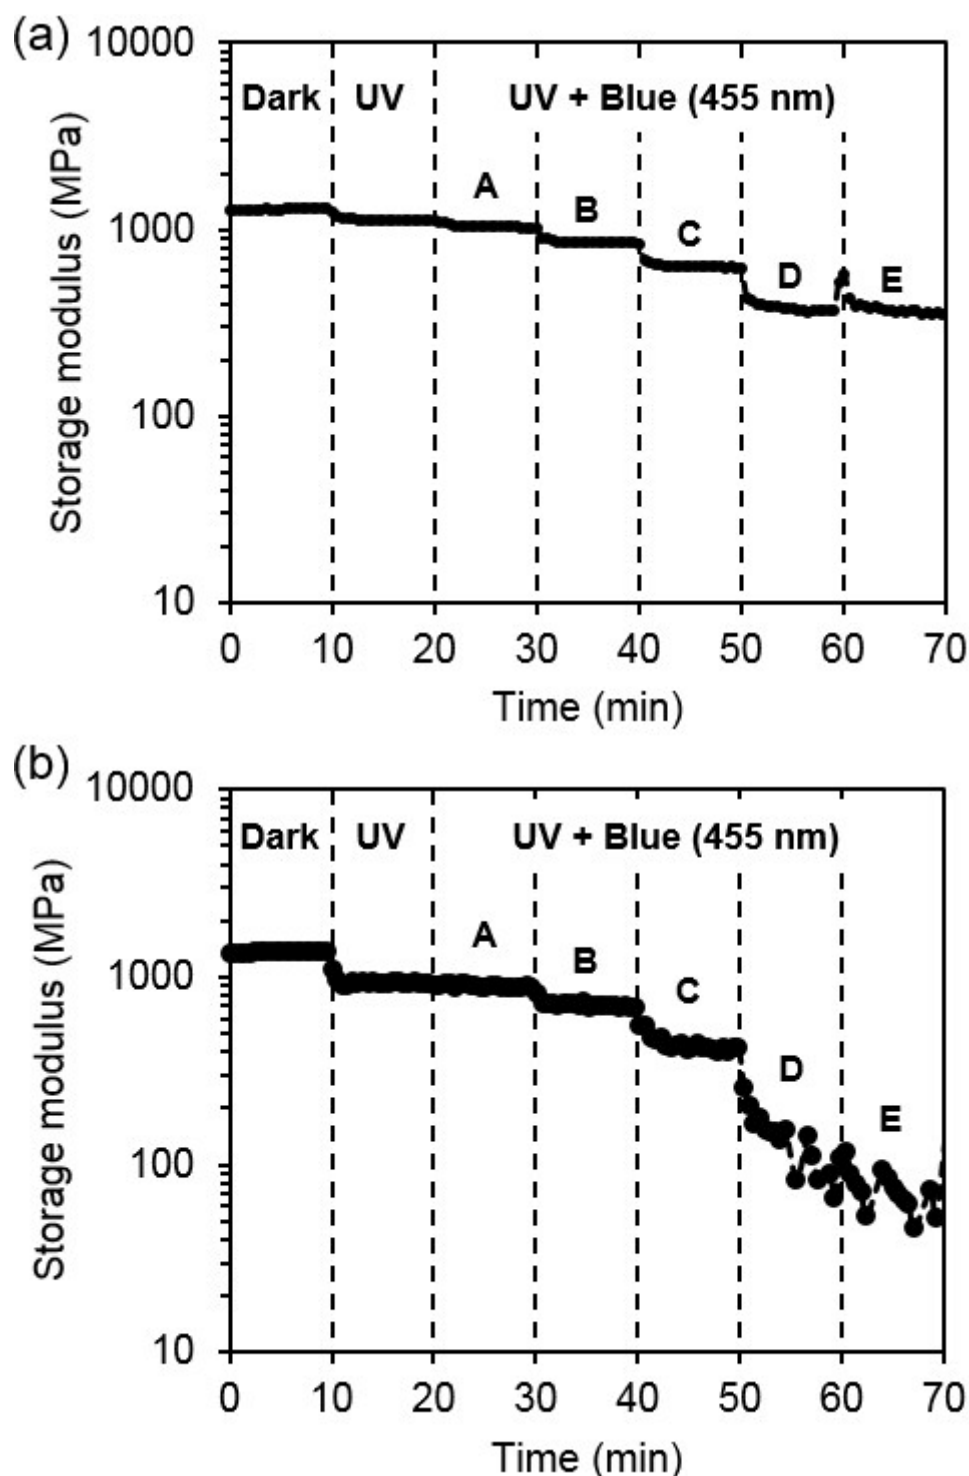

**Fig. S2** Decrease of the storage modulus under the exposure. Mixed UV and blue light is used. UV intensity is kept at (a)  $100 \text{ mW}\cdot\text{cm}^{-2}$  and (b)  $200 \text{ mW}\cdot\text{cm}^{-2}$ . At a constant UV intensity extra blue light with the intensity of 5, 20, 50, 100, 200  $\text{mW}\cdot\text{cm}^{-2}$  are added as indicated in the region A-E, respectively.

### Modulus changes of the high crosslinks sample

The effect of the crsslink density is investigated. A higher crosslinked sample with 37.4 w% of the crosslinker (compared with 27.4 w% of the low crosslinked sample) is subjected to the same experimental conditions as described in Fig. 3 (main text) and Fig. S2 in ESI. The storage modulus is measured in the dark, under UV (365 nm) illumination and at a constant UV intensity in combination with a stepwise increase of blue (455 nm) light.

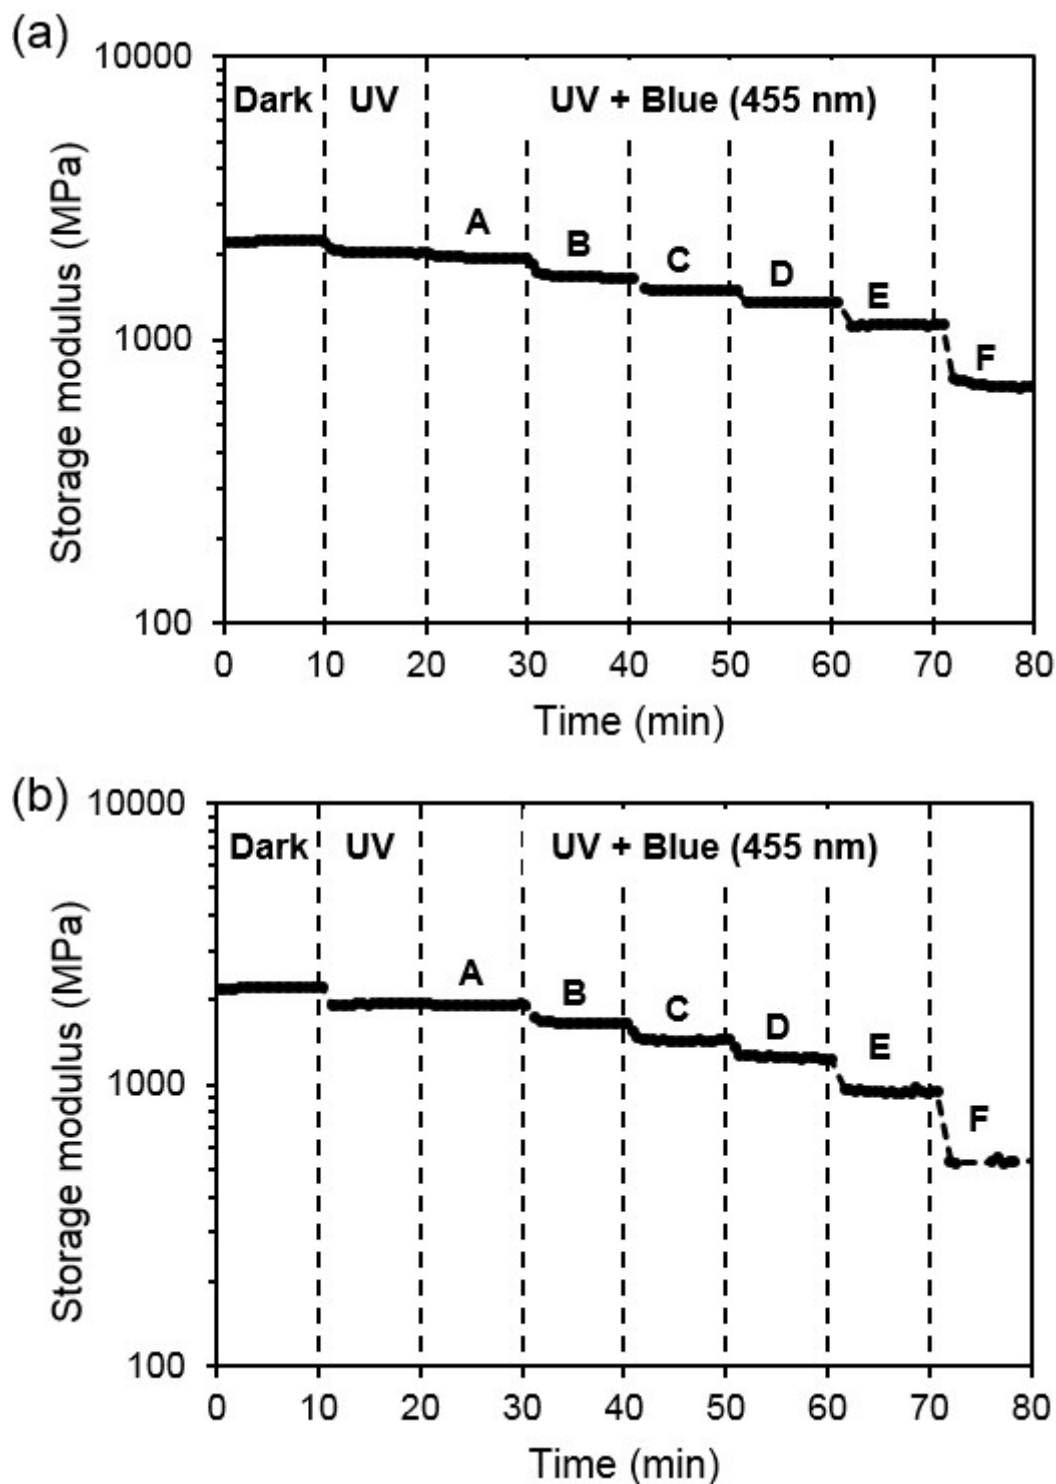

**Fig. S3** Storage modulus under the exposure with UV light and UV + blue light, respectively. UV intensity is kept at (a) 200 mW.cm<sup>-2</sup>, and (b) 300 mW.cm<sup>-2</sup>. In region A-E (both (a) and (b)) the intensity of blue light is 5, 15, 30, 50, 100, 200 mW.cm<sup>-2</sup>, respectively.
